# Supplementary material for: The Endoplasmic Reticulum-Mitochondrion Tether ERMES Orchestrates Fungal Immune Evasion, Illuminating Inflammasome Responses to Hyphal Signals
Source: PubMed Central journal article supplement (PMC4888881; doi:10.1128/msphere.00074-16), 2016-05-25

Figure S1

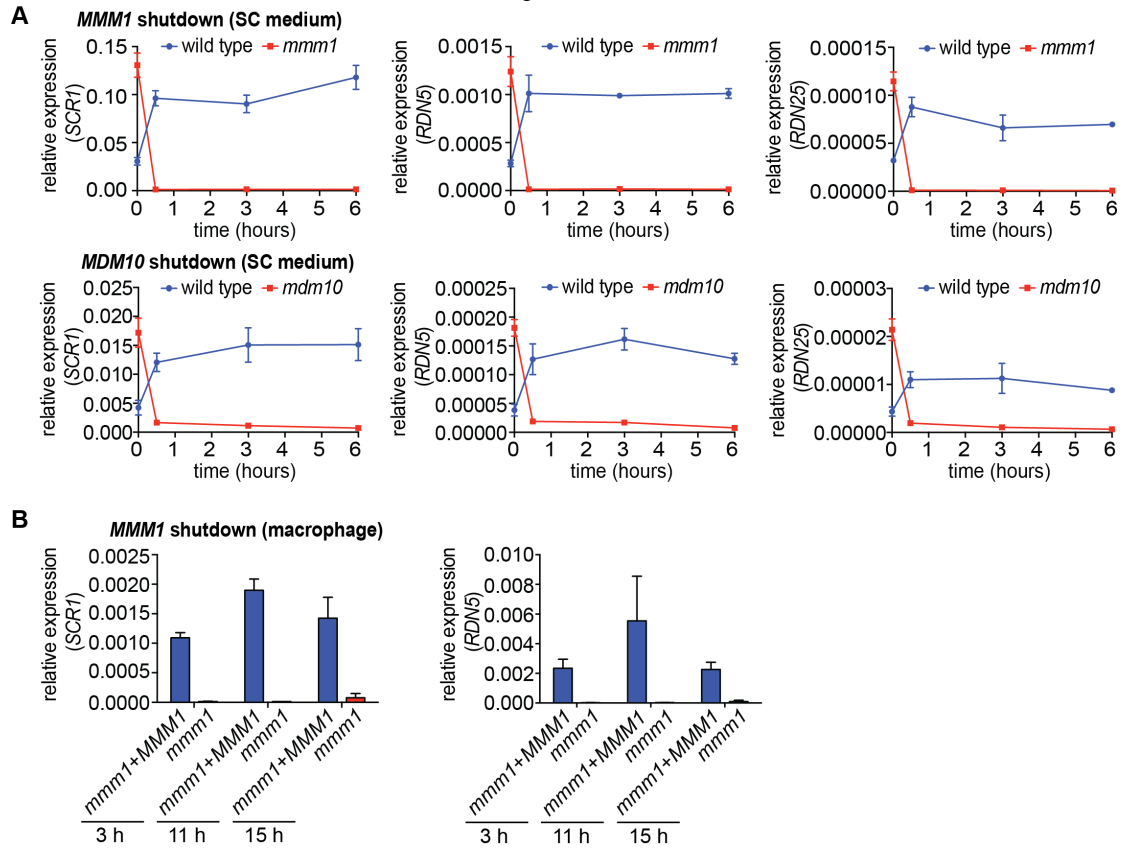

Figure S2

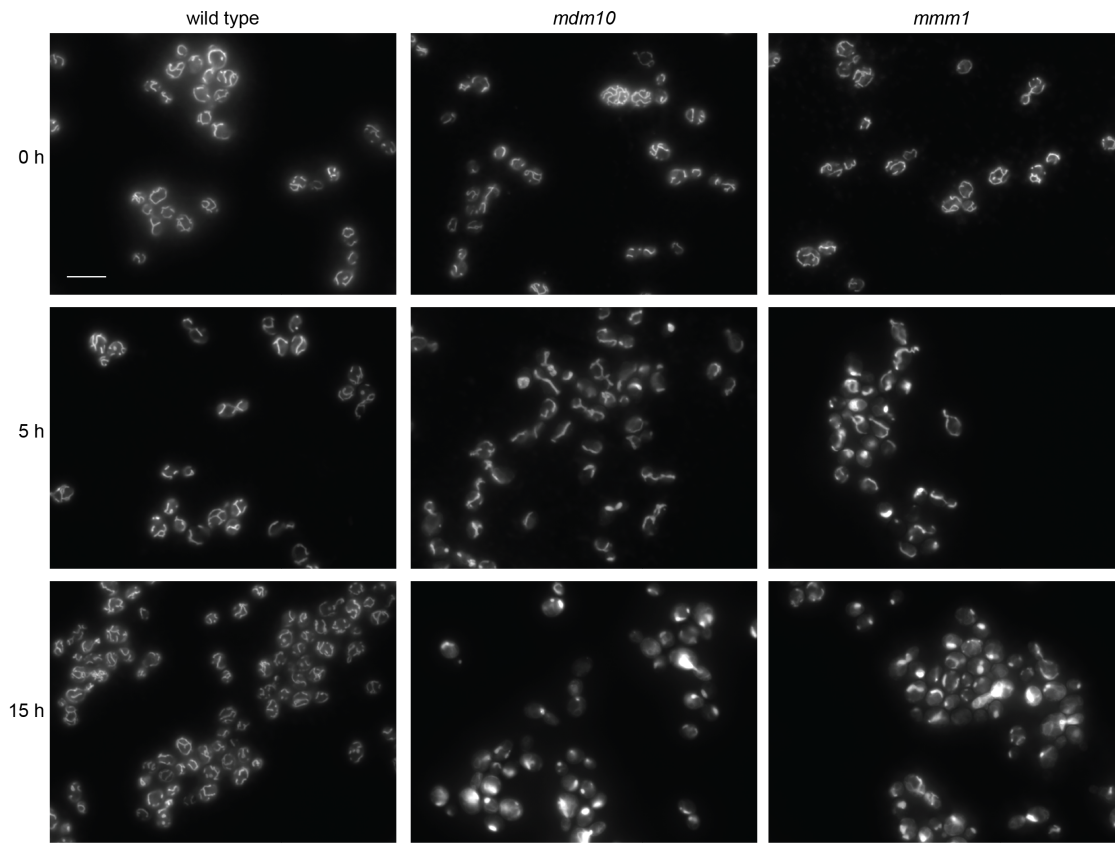

Figure S3

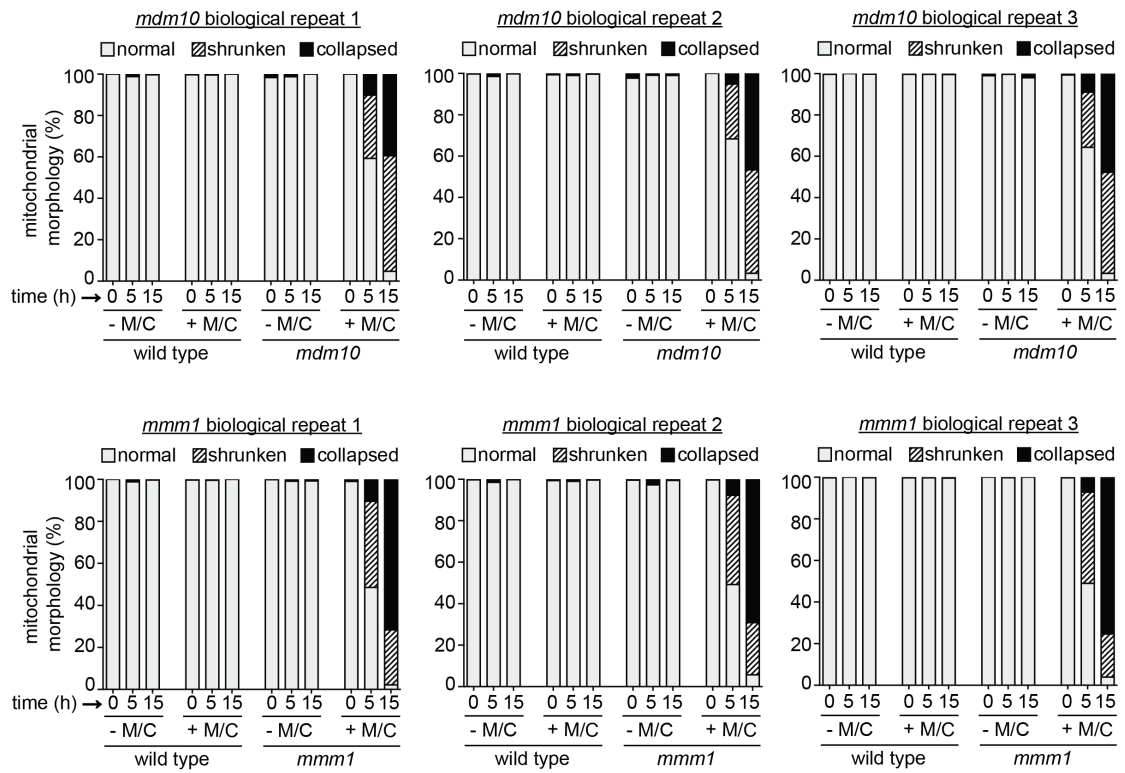

Figure S4

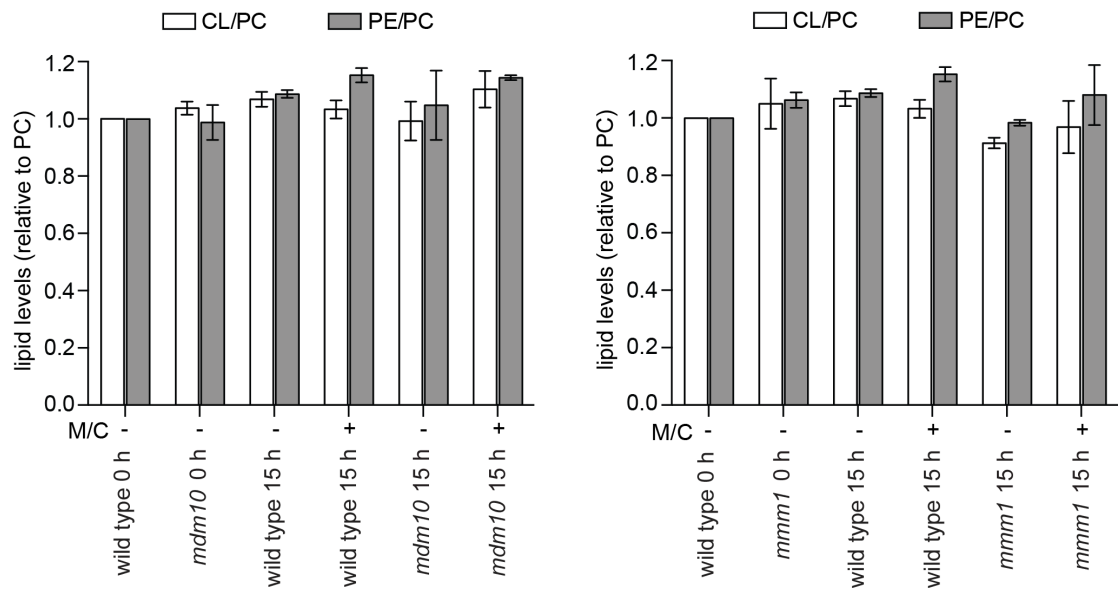



Figure S5

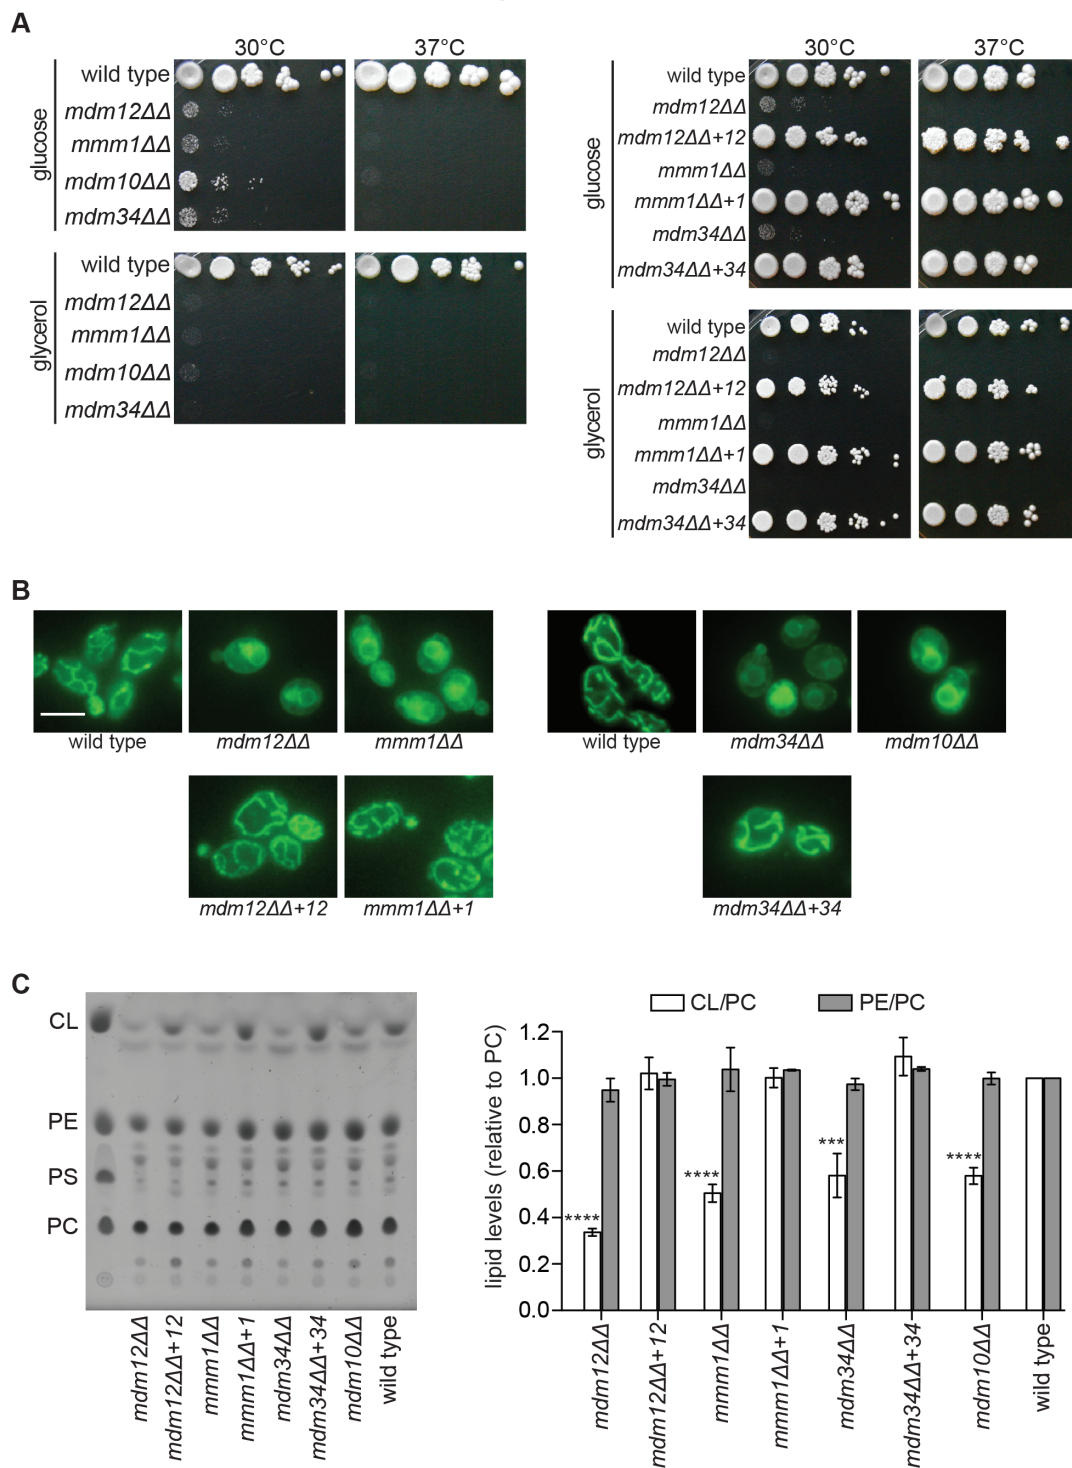

Figure S6

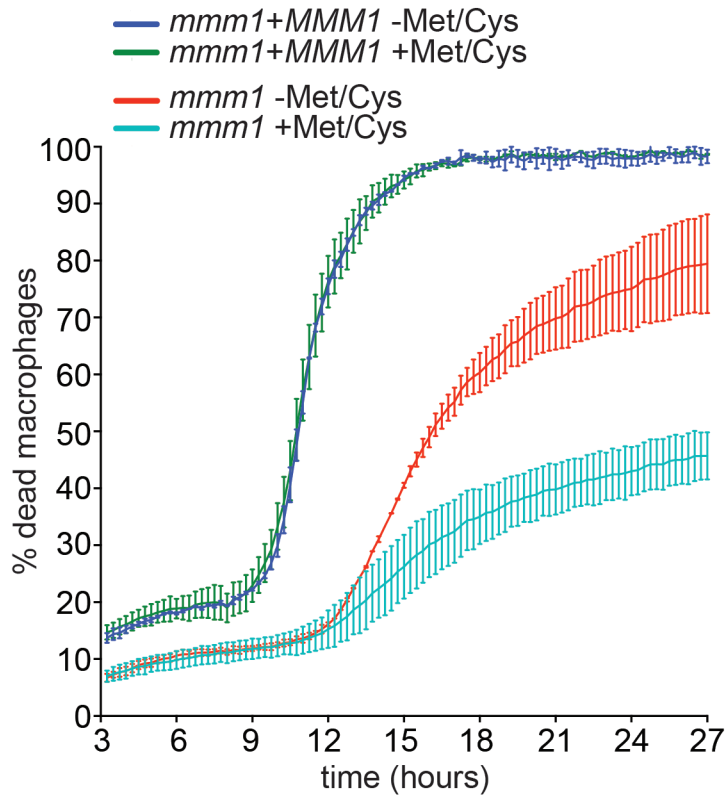

Figure S7

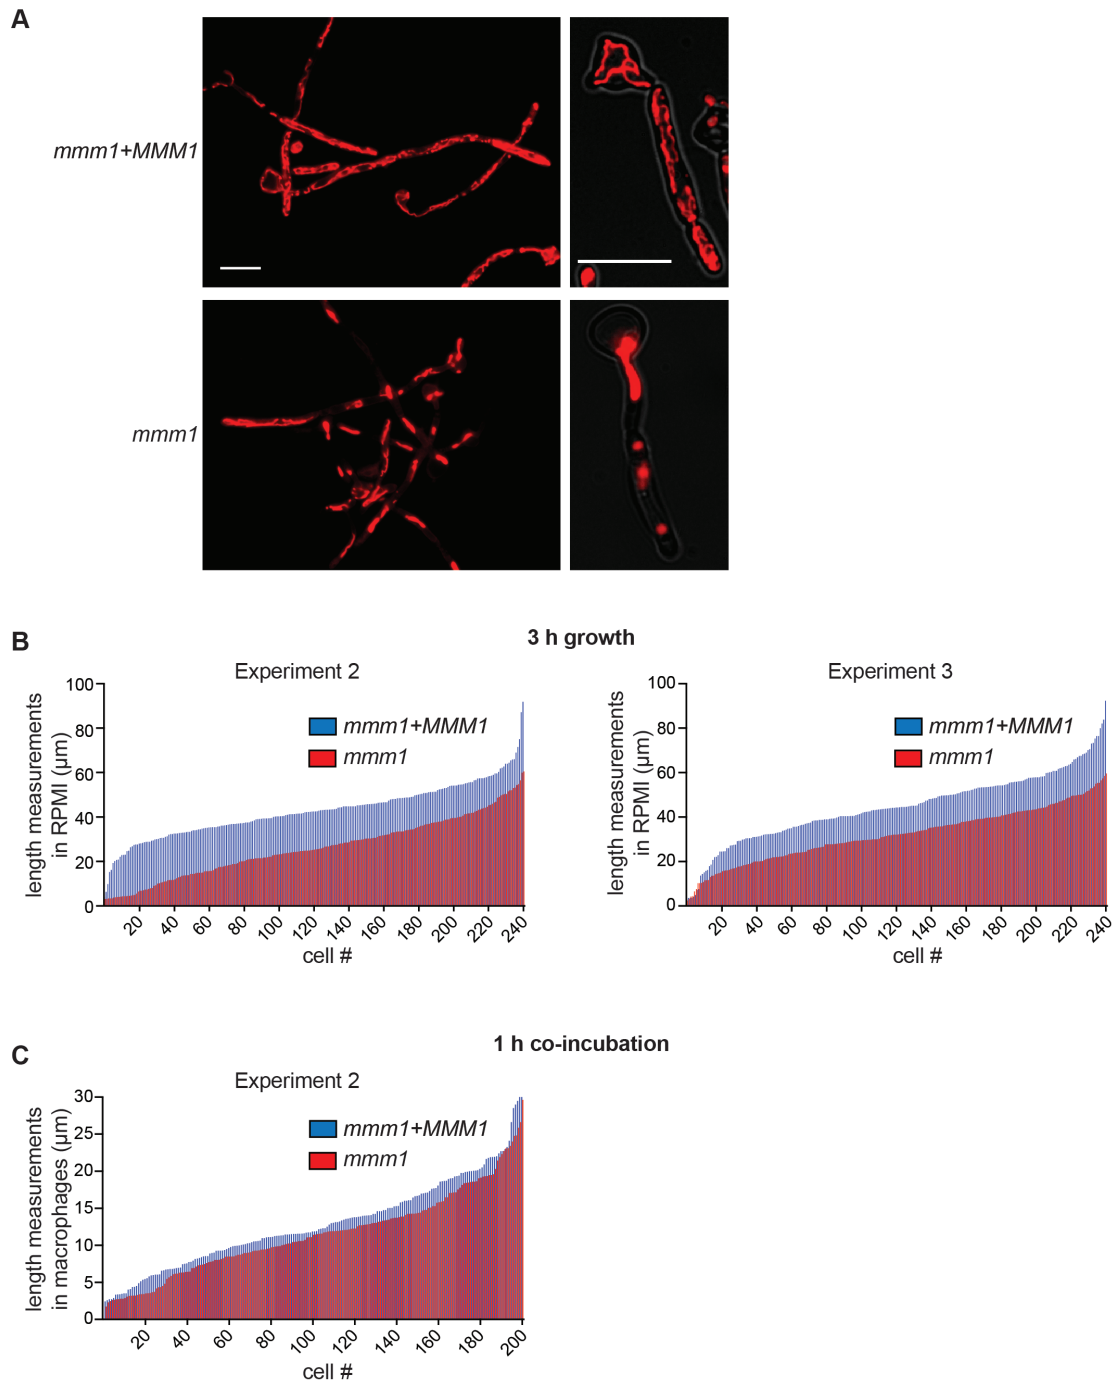

Supplement: sph003162089sf2.pdf [file sph003162089sf2.pdf]
