# Supplementary material for: The Endoplasmic Reticulum-Mitochondrion Tether ERMES Orchestrates Fungal Immune Evasion, Illuminating Inflammasome Responses to Hyphal Signals
Source: PubMed Central journal article supplement (PMC4888881; doi:10.1128/msphere.00074-16), 2016-05-25
Supplement: sph003162089st3.pdf [file sph003162089st3.pdf]

**Table S1**

| <b>Strain</b>  | <b>Genotype</b>                                                                                                                                                      | <b>Traven collection reference</b> |
|----------------|----------------------------------------------------------------------------------------------------------------------------------------------------------------------|------------------------------------|
| BWP17          | <i>ura3Δ::λimm434/ura3Δ::λimm434</i><br><i>arg4Δ::hisG/arg4Δ::hisG</i><br><i>his1Δ::hisG/his1Δ::hisG</i>                                                             | YCAT15                             |
| DAY185         | <i>ura3Δ::λimm434/ura3Δ::λimm434</i><br><i>arg4Δ::hisG/ARG4::URA3::arg4Δ::hisG</i><br><i>his1Δ::hisG/his1Δ::hisG::pHIS1</i>                                          | YCAT504                            |
| DAY286         | <i>ura3Δ::λimm434/ura3Δ::λimm434</i><br><i>arg4Δ::hisG/ARG4::URA3::arg4Δ::hisG</i><br><i>his1Δ::hisG/his::hisG</i>                                                   | YCAT14                             |
| <i>mdm10</i>   | <i>ura3Δ::λimm434/ura3Δ::λimm434</i><br><i>arg4Δ::hisG/arg4Δ::hisG</i><br><i>his1Δ::hisG/his1Δ::hisG::pHIS1</i><br><i>mdm10Δ::ARG4/URA3-P<sub>MET3</sub>-MDM10</i>   | YCAT597                            |
| <i>mmm1</i>    | <i>ura3Δ::λimm434/ura3Δ::λimm434</i><br><i>arg4Δ::hisG/arg4Δ::hisG</i><br><i>his1Δ::hisG/his1Δ::hisG::pHIS1</i><br><i>mmm1Δ::ARG4/URA3-P<sub>MET3</sub>-MMM1</i>     | YCAT595                            |
| <i>mmm1+1</i>  | <i>ura3Δ::λimm434/ura3Δ::λimm434</i><br><i>arg4Δ::hisG/arg4Δ::hisG</i><br><i>his1Δ::hisG/hisΔ::hisG::pHIS1-MMM1</i><br><i>mmm1Δ::ARG4/URA3-P<sub>MET3</sub>-MMM1</i> | YCAT697                            |
| <i>mdm12ΔΔ</i> | <i>ura3Δ::λimm434/ura3Δ::λimm434</i>                                                                                                                                 | YCAT735                            |

|                   |                                                                                                                                                                                                                                                                                                                                            |                                                        |
|-------------------|--------------------------------------------------------------------------------------------------------------------------------------------------------------------------------------------------------------------------------------------------------------------------------------------------------------------------------------------|--------------------------------------------------------|
|                   | <p><i>arg4Δ::hisG/arg4Δ::hisG</i></p> <p><i>his1Δ::hisG/hisΔ::hisG::pHIS1</i></p> <p><i>mdm12Δ::URA3/mdm12Δ::ARG4</i></p> <p>OR</p> <p><i>ura3Δ::λimm434/ura3Δ::λimm434</i></p> <p><i>arg4Δ::hisG/arg4Δ::hisG</i></p> <p><i>his1Δ::hisG/hisΔ::hisG</i></p> <p><i>mdm12Δ::URA3/mdm12Δ::ARG4</i></p>                                         | YCAT711                                                |
| <i>mdm12ΔΔ+12</i> | <p><i>ura3Δ::λimm434/ura3Δ::λimm434</i></p> <p><i>arg4Δ::hisG/arg4Δ::hisG</i></p> <p><i>his1Δ::hisG/hisΔ::hisG::pHIS-MDM12</i></p> <p><i>mdm12Δ::URA3/mdm12Δ::ARG4</i></p>                                                                                                                                                                 | YCAT741                                                |
| <i>mmm1ΔΔ</i>     | <p><i>ura3Δ::λimm434/ura3Δ::λimm434</i></p> <p><i>arg4Δ::hisG/arg4Δ::hisG</i></p> <p><i>his1Δ::hisG/hisΔ::hisG::pHIS1</i></p> <p><i>mmm1Δ::URA3/mmm1Δ::ARG4</i></p> <p>OR</p> <p><i>ura3Δ::λimm434/ura3Δ::λimm434</i></p> <p><i>arg4Δ::hisG/arg4Δ::hisG</i></p> <p><i>his1Δ::hisG/hisΔ::hisG</i></p> <p><i>mmm1Δ::URA3/mmm1Δ::ARG4</i></p> | YCAT734<br><br><br><br><br><br><br><br><br><br>YCAT705 |
| <i>mmm1ΔΔ+1</i>   | <p><i>ura3Δ::λimm434/ura3Δ::λimm434</i></p> <p><i>arg4Δ::hisG/arg4Δ::hisG</i></p> <p><i>his1Δ::hisG/hisΔ::hisG::pHIS1-MMM1</i></p> <p><i>mmm1Δ::URA3/mmm1Δ::ARG4</i></p>                                                                                                                                                                   | YCAT739                                                |
| <i>mdm10ΔΔ</i>    | <p><i>ura3Δ::λimm434/ura3Δ::λimm434</i></p>                                                                                                                                                                                                                                                                                                | YCAT726                                                |

|                   |                                                                                                                                                                                                                                                                                                         |                                            |
|-------------------|---------------------------------------------------------------------------------------------------------------------------------------------------------------------------------------------------------------------------------------------------------------------------------------------------------|--------------------------------------------|
|                   | <i>arg4Δ::hisG/arg4Δ::hisG</i><br><i>his1Δ::hisG/hisΔ::hisG</i><br><i>mdm10Δ::URA3/mdm10Δ::ARG4</i>                                                                                                                                                                                                     |                                            |
| <i>mdm34ΔΔ</i>    | <i>ura3Δ::λimm434/ura3Δ::λimm434</i><br><i>arg4Δ::hisG/arg4Δ::hisG</i><br><i>his1Δ::hisG/hisΔ::hisG::pHIS1</i><br><i>mdm34Δ::URA3/mdm34Δ::ARG4</i><br>OR<br><i>ura3Δ::λimm434/ura3Δ::λimm434</i><br><i>arg4Δ::hisG/arg4Δ::hisG</i><br><i>his1Δ::hisG/hisΔ::hisG</i><br><i>mdm34Δ::URA3/mdm34Δ::ARG4</i> | YCAT737<br><br><br><br><br><br><br>YCAT720 |
| <i>mdm34ΔΔ+34</i> | <i>ura3Δ::λimm434/ura3Δ::λimm434</i><br><i>arg4Δ::hisG/arg4Δ::hisG</i><br><i>his1Δ::hisG/hisΔ::hisG::pHIS1-MDM34</i><br><i>mdm34Δ::URA3/mdm34Δ::ARG4</i>                                                                                                                                                | YCAT747                                    |

**Table S2.**

| <b>Label</b> | <b>Primer sequence</b>                                                                                                                |
|--------------|---------------------------------------------------------------------------------------------------------------------------------------|
| MMM1 KO F'   | ATAGTGCCAGAGATTTACAGTGGGGGGAGAAAACTTCCAAAA<br>AATATCTTCTCTAGTACCACATGAAGATATTACAGATTGCAAATCA<br>AGTTGATCATTCCCAGTCACGACGTTGTAAAAC     |
| MMM1 KO R'   | CTGGATTTGTACTIONTACCCTACATCAGTTGAAGGTCTTAAAC<br>TAAAGAAAGATATACATCTCACTTCATTTAATAAATGTACATATAC<br>ACTGCAATGTGGAATTGTGAGCGGATA         |
| MMM1 MET R'  | TCAATTGTTCAAGTAAAGAGTCATGGATTTGATGACCTAGTTCTCT<br>TGCCTCAACTATTTTTGTTGTCGTTGCTGTTGTTTCAATTAATCCT<br>GTGACATGTTTTCTGGGGAGGGTATTTACTTT  |
| MDM10 KO F'  | CAATTAGCCTTTTTAATTTGTTGTTTAGATACTTACTTTTTCCCCTTT<br>TTTAATTTAATTCAATTCAACTGGTTTCTTTTTTTTCGGGGTTAGTTTT<br>TCAATTTCCCAGTCACGACGTT       |
| MDM10 KO R'  | GTAATATTTAATGCTACACTTACTCTATCTTCATCTCTATCTATCTA<br>TCAAAGGTATGGTTCTATATTATTTAACTAACCTATCTAGCAACTTA<br>CTTCTTGTTGAATTGTGAGCGGATA       |
| MDM10 MET R' | AAGCTTGAGATGTGGCAGTAATATTAGAATATATATTGTCTTCATT<br>CCAATTAGTTGATTTATAAAAACATTTCTGTAAGTATTCCATATATG<br>TATACATGTTTTCTGGGGAGGGTATTTACTTT |
| MDM12 KO F'  | CGACTTATTAAATTTTCATAAGTAAAGTCATTTTGAAGTGTATAAC<br>GTTCTCTCTTTACCAACCGATGACAACACCCAGTTAACGCAAGCAT<br>CATTATAATTTCCCAGTCACGACGTTGTAAAAC |
| MDM12 KO R'  | GCTATTACTATGTAATAATTTGATTTCTCAACCATATTGACCTGATA<br>TCGACTTTCTTTGTAGCAATTCATTTATGTCCATTTAGCACATTGTG<br>GTGATTAGTGGGAATTGTGAGCGGATA     |
| MDM12 MET R' | GGAGTGAGATATTTTTGAATTGCTGATCCAAAACTCTTTTTATCGA                                                                                        |

|                |                                                                                                                                  |
|----------------|----------------------------------------------------------------------------------------------------------------------------------|
|                | TTGATTGATCGTGTCAATCAATTGTTAATTGATTCCAATTAATATCAA<br>ATGACATGTTTTCTGGGGAGGGTATTTACTTT                                             |
| MDM34 KO F'    | ACCTTCTCCCCTTCCCCTTATAACTTCCAATTCTAACGGGTATTTC<br>GTACTTTGGAAACCAGCTAATCCTATAGCTTTTTGCACACTTTTTTT<br>ATAAACTTCCCAGTCACGACGTT     |
| MDM34 KO R'    | AAATAAAACAATCCAACATAGTATTTGTCATCTCTCATACTCTTTAT<br>GTAATAGATTTACGTTTACAATAAAAGAAACTCAAAATTCCATAAC<br>CTTCATGGTGGAAATTGTGAGCGGATA |
| MMM1 CHECK F'  | ACCGACAAGATTTCAAGTGTA                                                                                                            |
| MMM1 CHECK R'  | AAATAACTCATGACTACGCC                                                                                                             |
| MDM10 CHECK F' | ACAAACACCAAGAAGTTAAA                                                                                                             |
| MDM10 CHECK R' | GAAGCCAGATAATCTGTAGT                                                                                                             |
| MDM12 CHECK F' | ACATGTTACTGACTCAGCTA                                                                                                             |
| MDM12 CHECK R' | GGCTATTGGCGTGTTAGGTG                                                                                                             |
| MDM34 CHECK F' | AGACTTATAACACACACCAA                                                                                                             |
| MDM34 CHECK R' | TGTCACTAACAGACATTTAC                                                                                                             |
| ARG4 CHECK F'  | GGAATTGATCAATTATCTTTTGAAC                                                                                                        |
| ARG4 CHECK R'  | AAGTACACGACCCACAGTTA                                                                                                             |
| URA3 CHECK F'  | ATGGCACTACAGCAACTTTC                                                                                                             |
| URA3 CHECK R'  | AACGCGTTGGATGCATAGCT                                                                                                             |

**Table S3.**

| Gene                  | Primer sequence             |
|-----------------------|-----------------------------|
| <sup>1</sup> SCR1 F'  | TTTAGCATAACCACTGGAGGGAAG    |
| <sup>1</sup> SCR1 R'  | GAGTTGCAACACTAGATACCGCACT   |
| <sup>2</sup> RDN5 F'  | CATATCTAGCAGAAAGCACCGTTC    |
| <sup>2</sup> RDN5 R'  | ACAATAGTTTCGCGTATGGTCTC     |
| <sup>2</sup> RDN25 F' | GAGAGGAACCGTTCATTCAGATAAT   |
| <sup>2</sup> RDN25 R' | CTATGGTCCAGCGACTAAAAAGTCT   |
| <sup>2</sup> MMM1 F'  | GACTACCTTCATTATGGCCTAGAACT  |
| <sup>2</sup> MMM1 R'  | TAGCTGCACTCGTACCGTTTAC      |
| <sup>2</sup> MDM10 F' | ACCCTGCTGTGATTCCCAA         |
| <sup>2</sup> MDM10 R' | TGCTGCTGATAATCCAGGAC        |
| <sup>2</sup> HWP1 F'  | AATCCTCCTCAACCTGATCAGCCTG   |
| <sup>2</sup> HWP1 R'  | AGCTGGAGTTGTTGGCTTTTCTGGA   |
| <sup>2</sup> ECE1 F'  | TGCCGTCGTCAGATTGCCAGA       |
| <sup>2</sup> ECE1 R'  | AGGCCAACATCTGGAACGCCA       |
| <sup>1</sup> PHR1 F'  | CTAATTTGCCACCAACTCCA        |
| <sup>1</sup> PHR1 R'  | TCGTCAGCAACAACACATTC        |
| <sup>3</sup> SAP5 F'  | AGAATTTCCCGTCGATGAGACTGGT   |
| <sup>3</sup> SAP5 R'  | CAAATTTTGGGAAGTGCGGGAAGA    |
| <sup>3</sup> SAP6 F'  | CCCGTTTTGAAATTAATATGCTGATGG |
| <sup>3</sup> SAP6 R'  | GTCGTAAGGAGTTCTGGTAGCTTCG   |

<sup>1</sup>Reference: Verma-Gaur, J., Y. Qu, P. F. Harrison, T. L. Lo, T. Quenault, M. J. Dagley M., Bellousoff, D. R. Powell, T. H. Beilharz, and A. Traven. 2015. Integration of Posttranscriptional Gene Networks into Metabolic Adaptation and Biofilm Maturation in *Candida albicans*. *PLoS genetics* **11**:e1005590.

<sup>2</sup>Reference: This study

<sup>3</sup>Reference: Naglik, J. R., C. A. Rodgers, P. J. Shirlaw, J. L. Dobbie, L. L. Fernandes-Naglik, D. Greenspan, N. Agabian, and S. J. Challacombe. 2003. Differential expression of *Candida albicans* secreted aspartyl proteinase and phospholipase B genes in humans

correlates with active oral and vaginal infections. The Journal of infectious diseases 188:469-479.
